# Supplementary material for: Centre of pressure during walking after unilateral transfemoral amputation
Source: Sci Rep. 2022 Oct 19;12:17501. doi: 10.1038/s41598-022-22254-5 (PMC9582189; doi:10.1038/s41598-022-22254-5)
Supplement: Supplementary file 1 — Supplementary Information 1. [file 41598_2022_22254_MOESM1_ESM.xlsx]

## Sheet: Sheet1
Table S1. Demographic data of able-bodied controls and individuals with UTFA.
Participant	Sex	Age (years)	Height (m)	Mass (kg)	Preferred walking speed (km/h)	Time since amputation (years)	Prosthetic knee unit	Prosthetic feet	Amputated limb	Cause of amputation
Individual with UTFA
1	M	43	1.67	57.6	4.1	7.5	3R106	Triton	Left	Cancer
2	M	55	1.7	69.9	3.5	32	4-Bar Intelligent Knee (NI-C421)	Lapoc J-foot	Left	Trauma
3	M	23	1.68	58.3	5.3	20	3R80	Valiflex	Left	Cancer
4	F	21	1.49	47.1	3.7	10	3R106	Total Concept	Right	Sarcoma
5	F	21	1.56	59.8	3.6	7.5	Genium	Proflex LP align	Right	Trauma
6	M	27	1.75	70.9	6	6.2	3R80	1C64 Triton	Right	Trauma
7	M	34	1.61	61.4	4.5	21	3R95	Valiflex	Left	Sarcoma
8	M	17	1.77	84	4.2	3	NK-6	Triton	Right	Congenital
9	F	21	1.52	52.1	3.7	13.1	3R106	Elation	Left	Sarcoma
10	M	31	1.65	61.5	3.8	3	Hybrid knee	Hilander	Right	Trauma
11	M	32	1.7	69.7	3.8	23	3R106	Valiflex	Right	Sarcoma
12	F	27	1.54	46.4	3.6	1	3R60	RS2000 Runway	Right	Trauma
13	M	29	1.65	70.1	5	7.7	3R80	1C61 Triton	Right	Trauma
14	F	20	1.62	45.8	4.3	3.5	Hybrid knee	Ambitious	Left	Sarcoma
15	M	31	1.72	64	3.3	7.8	Mauch knee	Elation	Right	Sarcoma
16	M	38	1.61	63.5	4.3	19	Genium	Triton	Right	Trauma
17	M	42	1.75	111.2	3.6	24.5	3R80	Dyna Trek	Right	Trauma
18	M	42	1.7	75.4	3.5	32	3R80	Hilander	Right	Trauma
19	M	48	1.73	82.1	3.8	13	Rheo Knee xc	Proflex	Left	Trauma
20	M	25	1.71	71.8	3.5	7	C-Leg ver. 4	Triton	Right	Trauma
21	M	26	1.71	65.6	4.4	4.1	Rheo Knee	Rheo Knee	Left	Trauma
22	F	29	1.64	63.2	5	12	Genium	Triron	Left	Trauma
23	M	48	1.63	54.4	2.3	3	NK-6	Triton	Right	Congenital
24	M	24	1.6	61.1	4.5	5.5	Rheo Knee	J-foot	Right	Trauma
25	M	34	1.7	77.1	3.7	18	SuKnee	Valiflex	Right	Trauma
Mean		31.52	1.6564	65.76	4.04	12.176
SD		9.86355	0.0729317	13.6658	0.735935	8.91934
Able-bodied controls
1	M	51	1.67	65.8	3.8
2	M	37	1.76	73.2	4.2
3	F	23	1.59	54.3	3.9
4	F	28	1.63	53.1	4.4
5	M	33	1.8	71.9	5.3
6	F	23	1.61	62.7	4.5
7	M	26	1.72	71.8	3.8
8	F	21	1.57	58.4	4.2
9	M	24	1.63	59.2	3.9
10	M	45	1.74	92.9	4.3
11	M	32	1.71	80.5	4.1
12	M	24	1.68	57.1	4.3
13	M	48	1.77	88.1	5
14	M	34	1.62	79.4	4.1
15	M	21	1.71	60	4.3
16	M	21	1.66	65.6	4
17	M	38	1.7	79.6	3.8
18	M	22	1.69	53.4	4
19	M	22	1.72	67.4	4.4
20	M	22	1.67	71	3.5
21	M	25	1.68	78.6	3.2
22	M	22	1.73	60	3.5
23	M	25	1.6	61.9	4.1
24	M	23	1.75	79.7	4.5
25	F	23	1.59	52.9	4.1
Mean		28.52	1.68	67.94	4.128
SD		8.75041	0.061384	11.1412	0.436825
