# Supplementary material for: Centre of pressure during walking after unilateral transfemoral amputation
Source: Sci Rep. 2022 Oct 19;12:17501. doi: 10.1038/s41598-022-22254-5 (PMC9582189; doi:10.1038/s41598-022-22254-5)
Supplement: Supplementary file 3 — Supplementary Information 3. [file 41598_2022_22254_MOESM3_ESM.xlsx]

## Sheet: Table2
	Table S3. Values of three key gait parameters in able-bodied controls and individuals with UTFA (mean ± standard deviation).
	Speed [km/h]	Able-bodied controls				Individuals with UTFA
		LS [mm]	LV [mm]	APV [mm]		LS [mm]	LV [mm]	APV [mm]
	2	9.17 ± 2.36	11.97 ± 3.35	36.13 ± 20.42		30.29 ± 16.65	17.96 ± 7.39	48.83 ± 26.41
	2.5	7.97 ± 2.80	10.19 ± 4.35	31.97 ± 16.41		25.05 ± 14.70	14.79 ± 6.78	42.16 ± 26.82
	3	6.50 ± 2.58	9.94 ± 4.03	38.50 ± 20.47		22.14 ± 13.09	14.83 ± 8.44	52.40 ± 21.55
	3.5	7.46 ± 5.73	13.34 ± 20.42	52.37 ± 44.11		20.19 ± 11.59	14.18 ± 6.52	50.72 ± 23.26
	4	6.24 ± 1.81	9.11 ± 3.37	38.94 ± 21.30		19.30 ± 12.01	12.82 ± 5.16	48.61 ± 22.48
	4.5	5.96 ± 1.91	8.53 ± 3.68	39.24 ± 17.50		19.30 ± 13.11	17.56 ± 8.77	59.74 ± 36.21
	5	6.41 ± 2.44	9.01 ± 4.68	43.44 ± 27.78		17.36 ± 11.20	11.93 ± 4.21	47.51 ± 29.74
	5.5	5.98 ± 2.14	8.99 ± 5.21	46.05 ± 20.40		17.26 ± 11.17	16.06 ± 7.73	56.12 ± 28.67
	Abbreviation: LS, Lateral Symmetry; LV, Lateral Variability; APV, Anterior-Posterior Variability.
